# Supplementary material for: The Peroxiredoxin Asp f3 Acts as Redox Sensor in Aspergillus fumigatus
Source: MDPI journal article supplement (doi:10.3390/genes12050668), 2021-04-29
Supplement: s1 [file s1]

## Supplementary Information - Boysen et al.,

### Supplementary Figures

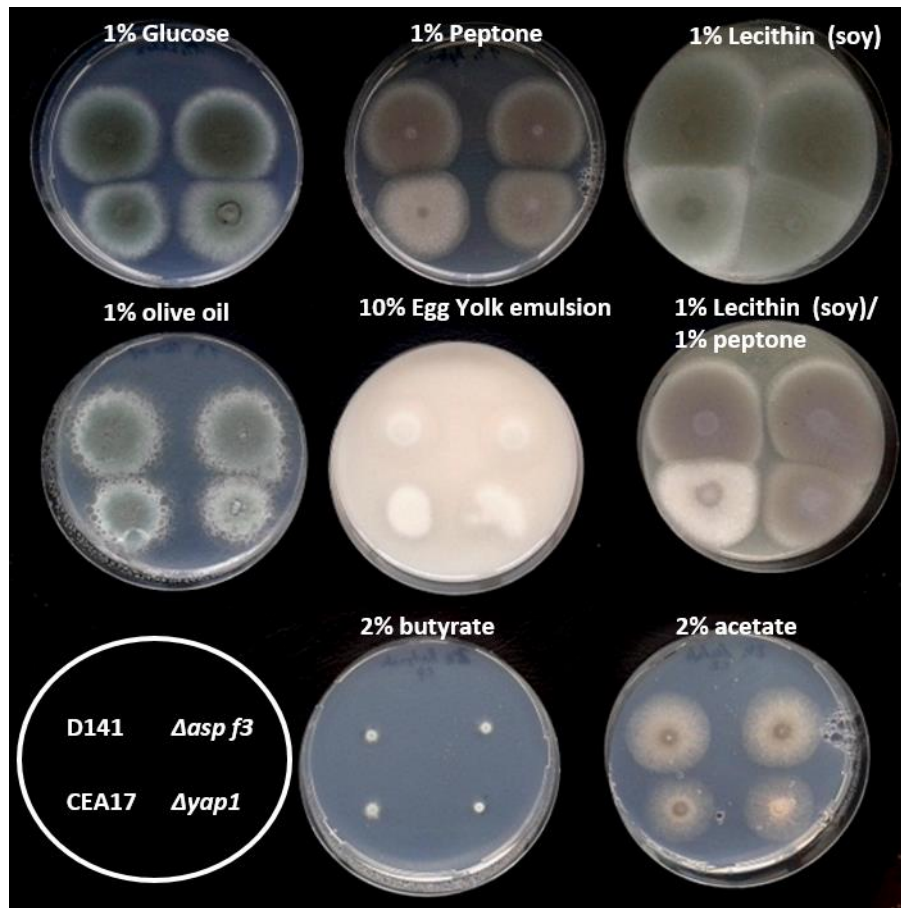

**Supplementary Fig. 1: Growth of *Aspergillus fumigatus* on minimal media (AMM) with various carbon sources.**

$2 \times 10^4$  conidia of the wild type (D141) and the *asp f3* deletion mutant ( $\Delta aspF3$ ) were point-inoculated on AMM with indicated supplements (% w/v) as carbon/nutrient sources and incubated at 37°C for 48 h. The *Afyap1* deletion strain ( $\Delta yap1$ ) and its wild type like parent CEA17 $\DeltaakuB^{KU80}$  (CEA17) are shown for comparison.

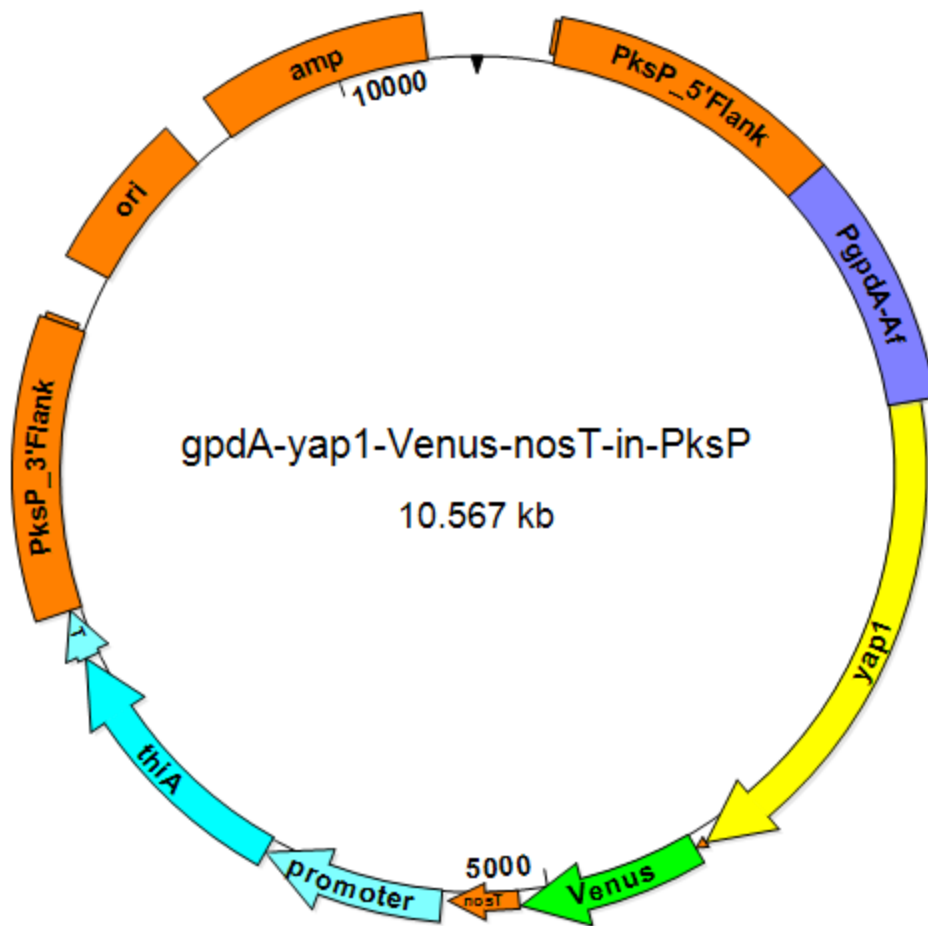

**Supplementary Fig. 2: Overexpression construct for *Afyap1*<sup>VENUS</sup>.** A Vector Map of gpdA-Afyap1-VENUS including the pyrithiamine resistance gene *thiA* (*ptrA*) gene of *Aspergillus oryzae* as a selectable marker for successful transformation in *A. fumigatus*.

1 **Supplementary Table 1: Results of the gene enrichment analysis (GO-term search, molecular function)**

| GO name                                                | GO ID      | Gene ID                                                                                                                                                                                                                                                                                                                                                                                                                                                                                                                                                                                                                                                                                                                                                 |
|--------------------------------------------------------|------------|---------------------------------------------------------------------------------------------------------------------------------------------------------------------------------------------------------------------------------------------------------------------------------------------------------------------------------------------------------------------------------------------------------------------------------------------------------------------------------------------------------------------------------------------------------------------------------------------------------------------------------------------------------------------------------------------------------------------------------------------------------|
| oxidoreductase activity                                | GO:0016491 | AFUA_1G02820; AFUA_1G03250; AFUA_1G12460; AFUA_1G14520; AFUA_1G14540; AFUA_1G15610; AFUA_2G00170; AFUA_2G00460; AFUA_2G04060; AFUA_2G04330; AFUA_2G06000; AFUA_2G09580; AFUA_2G16570; AFUA_2G17850; AFUA_3G00180; AFUA_3G00865; AFUA_3G01290; AFUA_3G01780; AFUA_3G03030; AFUA_3G09540; AFUA_3G12270; AFUA_3G15350; AFUA_4G09920; AFUA_4G12990; AFUA_4G14490; AFUA_5G01030; AFUA_5G01250; AFUA_5G01290; AFUA_5G01450; AFUA_5G02020; AFUA_5G07000; AFUA_5G08900; AFUA_5G09910; AFUA_5G10060; AFUA_5G10070; AFUA_5G14000; AFUA_5G14800; AFUA_6G00280; AFUA_6G02820; AFUA_6G09670; AFUA_6G10120; AFUA_6G10720; AFUA_6G13750; AFUA_7G06260; AFUA_7G06420; AFUA_7G06600; AFUA_8G01550; AFUA_8G01630; AFUA_4G09110; AFUA_8G01670; AFUA_6G02280; AFUA_4G10770; |
| inorganic phosphate transmembrane transporter activity | GO:0005315 | AFUA_3G03010; AFUA_7G06350; AFUA_8G01850;                                                                                                                                                                                                                                                                                                                                                                                                                                                                                                                                                                                                                                                                                                               |
| peroxidase activity                                    | GO:0004601 | AFUA_3G12270; AFUA_4G09110; AFUA_8G01670; AFUA_6G02280; AFUA_4G10770;                                                                                                                                                                                                                                                                                                                                                                                                                                                                                                                                                                                                                                                                                   |
| glutathione transferase activity                       | GO:0004364 | AFUA_2G00590; AFUA_3G10830 (GstA); AFUA_6G09690;                                                                                                                                                                                                                                                                                                                                                                                                                                                                                                                                                                                                                                                                                                        |
| FMN binding                                            | GO:0010181 | AFUA_1G02820; AFUA_2G04060; AFUA_3G00865; AFUA_5G01450 AFUA_7G06420;                                                                                                                                                                                                                                                                                                                                                                                                                                                                                                                                                                                                                                                                                    |

2

3

4

5 **Supplementary Table 2: Results of the gene enrichment analysis (GO-term search, biological process)**

| GO name                        | GO ID      | Gene ID                                                                                                                                                                                                                                                                                                                                                                                                                                                                                                                                                                                                                                                                                                                                                                                                                                                                                                                                                           |
|--------------------------------|------------|-------------------------------------------------------------------------------------------------------------------------------------------------------------------------------------------------------------------------------------------------------------------------------------------------------------------------------------------------------------------------------------------------------------------------------------------------------------------------------------------------------------------------------------------------------------------------------------------------------------------------------------------------------------------------------------------------------------------------------------------------------------------------------------------------------------------------------------------------------------------------------------------------------------------------------------------------------------------|
| Oxidation-reduction process    | GO:0055114 | AFUA_1G02820 ( <i>Pst2</i> ); AFUA_1G03250; AFUA_1G12460; AFUA_1G14520; AFUA_1G14540; AFUA_1G15610; AFUA_2G00170; AFUA_2G00460; AFUA_2G04060; AFUA_2G04330; AFUA_2G06000; AFUA_2G09580; AFUA_2G16570; AFUA_2G17850; AFUA_3G00180; AFUA_3G00865; AFUA_3G01290; AFUA_3G01780; AFUA_3G02300; AFUA_3G03030; AFUA_3G09540; AFUA_3G10830 ( <i>GstA</i> ); AFUA_3G12270; AFUA_3G15050; AFUA_3G15350; AFUA_4G09920; AFUA_4G12990 ( <i>trr1</i> ); AFUA_4G14490; AFUA_5G01030; AFUA_5G01250; AFUA_5G01290; AFUA_5G01450; AFUA_5G02020; AFUA_5G07000; AFUA_5G08900; AFUA_5G09910; AFUA_5G10060; AFUA_5G10070; AFUA_5G11320; AFUA_5G14000; AFUA_5G14800; AFUA_6G00280; AFUA_6G02820; AFUA_6G09670 ( <i>GliC</i> ); AFUA_6G09730 ( <i>GliF</i> ); AFUA_6G10120 ( <i>ToxD</i> ); AFUA_6G10720; AFUA_6G13750; AFUA_7G06260; AFUA_7G06420; AFUA_7G06600; AFUA_8G01550; AFUA_8G01630; AFUA_4G09110 ( <i>ccp1</i> ); AFUA_8G01670 ( <i>Cat2</i> ); AFUA_6G02280 ( <i>asp f3</i> ); |
| mycotoxin biosynthetic process | GO:0043386 | AFUA_6G09660 ( <i>GliP</i> ); AFUA_6G09670 ( <i>GliC</i> ), AFUA_6G09680 ( <i>GliM</i> ), AFUA_6G09690 ( <i>GliG</i> ), AFUA_6G09710 ( <i>GliA</i> ), AFUA_6G09720 ( <i>GliN</i> ), AFUA_6G09730 ( <i>GliF</i> ),                                                                                                                                                                                                                                                                                                                                                                                                                                                                                                                                                                                                                                                                                                                                                 |
| transmembrane transport        | GO:0055085 | AFUA_1G10390; AFUA_1G12620; AFUA_1G13350; AFUA_1G13360; AFUA_1G17160; AFUA_2G02040; AFUA_2G05840; AFUA_2G16860; AFUA_3G03010; AFUA_3G11490; AFUA_3G12010; AFUA_3G14560; AFUA_3G15250; AFUA_4G00120; AFUA_4G01050; AFUA_4G12260; AFUA_4G13820; AFUA_4G13830; AFUA_5G00790; AFUA_5G07970; AFUA_5G11980; AFUA_6G03860; AFUA_6G04360; AFUA_6G09710 ( <i>GliA</i> ); AFUA_6G12550; AFUA_7G00390; AFUA_7G05100; AFUA_7G06350; AFUA_7G06390; AFUA_8G00770; AFUA_8G01850; AFUA_8G04470; AFUA_8G06610                                                                                                                                                                                                                                                                                                                                                                                                                                                                      |
| phosphate ion transport        | GO:0006817 | AFUA_3G03010, AFUA_7G06350, AFUA_8G01850,                                                                                                                                                                                                                                                                                                                                                                                                                                                                                                                                                                                                                                                                                                                                                                                                                                                                                                                         |
| response to oxidative stress   | GO:0006979 | AFUA_3G12270, AFUA_4G09110 ( <i>ccp1</i> ), AFUA_8G01670 ( <i>Cat2</i> ), AFUA_4G10770,                                                                                                                                                                                                                                                                                                                                                                                                                                                                                                                                                                                                                                                                                                                                                                                                                                                                           |

7 **Supplementary Table 3: Primer list for the generation of *Afyap1*<sup>VENUS</sup>**

| Primer                | Sequence                                                     | Application                                                                     |
|-----------------------|--------------------------------------------------------------|---------------------------------------------------------------------------------|
| PksP_5'F_OH_BB_F      | GCCTCTTCGCTATTACGCCAGCAATTCGAGG<br>ATGTCTTCCG                | Amplification of PksP 5'Flank                                                   |
| PksP_5'F_OH_gpdA_R    | CGGAACAATGTTAATCCACAACTACGGAG<br>TAGTGATTATCCTGGACC          | Amplification of PksP 5'Flank                                                   |
| PksP_3'F_OH_Pth_F_neu | GGGGCATTCTAGAATAATTATGTGTAACAA<br>GAAAGAGGGGTGGAGTTGTGCATACC | Amplification of PksP 3'Flank                                                   |
| PksP_3'F_OH_BB_R_neu  | GTTGGCCGATTCATTAATGCAGTTCATTGGG<br>GGCGGTTACTCG              | Amplification of PksP 3'Flank                                                   |
| PksP_5'F_F            | CAATTCGAGGATGTCTTCCG                                         | Generation of <i>Afyap1</i> -VENUS<br>overexpression fragment                   |
| PksP_3'F_R            | GGCTTTGTCCAATCACATCCAGC                                      | Generation of <i>Afyap1</i> -VENUS<br>overexpression fragment                   |
| PgpdA_F_1             | GTAGTTTGTGGATTAACATTGTTCCG                                   | Amplification of <i>gpdA</i> -promoter<br>sequence                              |
| P_gpdA_rev            | TGTGTAGATTCGTCTGGTACTGAGC                                    | Amplification of <i>gpdA</i> -promoter<br>sequence                              |
| Yap1_F                | ATGGCGGACTACAATACTC                                          | Amplification of <i>Afyap1</i> -Gene                                            |
| Yap1_OH_Link_V_R      | CCTCCGCCAGATCCGCCCTCTTTGACGC<br>GACCCATGATGTCC               | Amplification of <i>Afyap1</i> -Gene                                            |
| pUC_BB_fw             | CTGCATTAATGAATCGGCCAACGC                                     | Generation of pUC-vector backbone                                               |
| pUC_BB_rev            | CTGGCGTAATAGCGAAGAGGC                                        | Generation of pUC-vector backbone                                               |
| VENUS_Link_Fwd        | GGAGGCGGCGGATCTGGCGGAGG                                      | Generation of combined Linker-<br>VENUS and pyrithiamine resistance<br>cassette |
| Pth fwd               | TCTTTCTTGTTACACATAATTATTCTAGAATG<br>CCCC                     | Generation of combined Linker-<br>VENUS and pyrithiamine resistance<br>cassette |
